# Supplementary material
Source: publisher figshare collection journal article supplement (https://gsapubs.figshare.com/articles/dataset/_/12542945)

Pedro Quelhas, João Mata, and Ágata Alveirinho Dias, 2020, Evidence for mixed contribution of mantle and lower and upper crust to the genesis of Jurassic I-type granites from Macao, SE China: GSA Bulletin, <https://doi.org/10.1130/B35552.1>.

## Data Repository

**Appendix 1.** Location of analyzed samples.

**Appendix 2.** (A) Electron microprobe standards and detection limits; (B) Detection limits of whole-rock elemental analyses.

**Appendix 3.** Color version of Fig. 3—hand specimens and thin-sections representative of the different lithofacies observed in Macao.

**Appendix 4.** (A) Representative chemical analyses of feldspars from Macao granites and microgranular mafic enclaves, (B) Chemical composition of zoned plagioclase crystals from Macao granites and microgranular mafic enclaves, (C) Representative chemical analyses of biotites from Macao granites and microgranular mafic enclaves.

**Appendix 5.** Whole-rock major and trace element compositions from Macao granites and microgranular mafic enclaves.

**Appendix 6.** Whole-rock isochron diagrams for Macao granites and microgranular mafic enclaves.

**Appendix 7.** Mineral/melt partition coefficients used to calculate fractionation vectors.

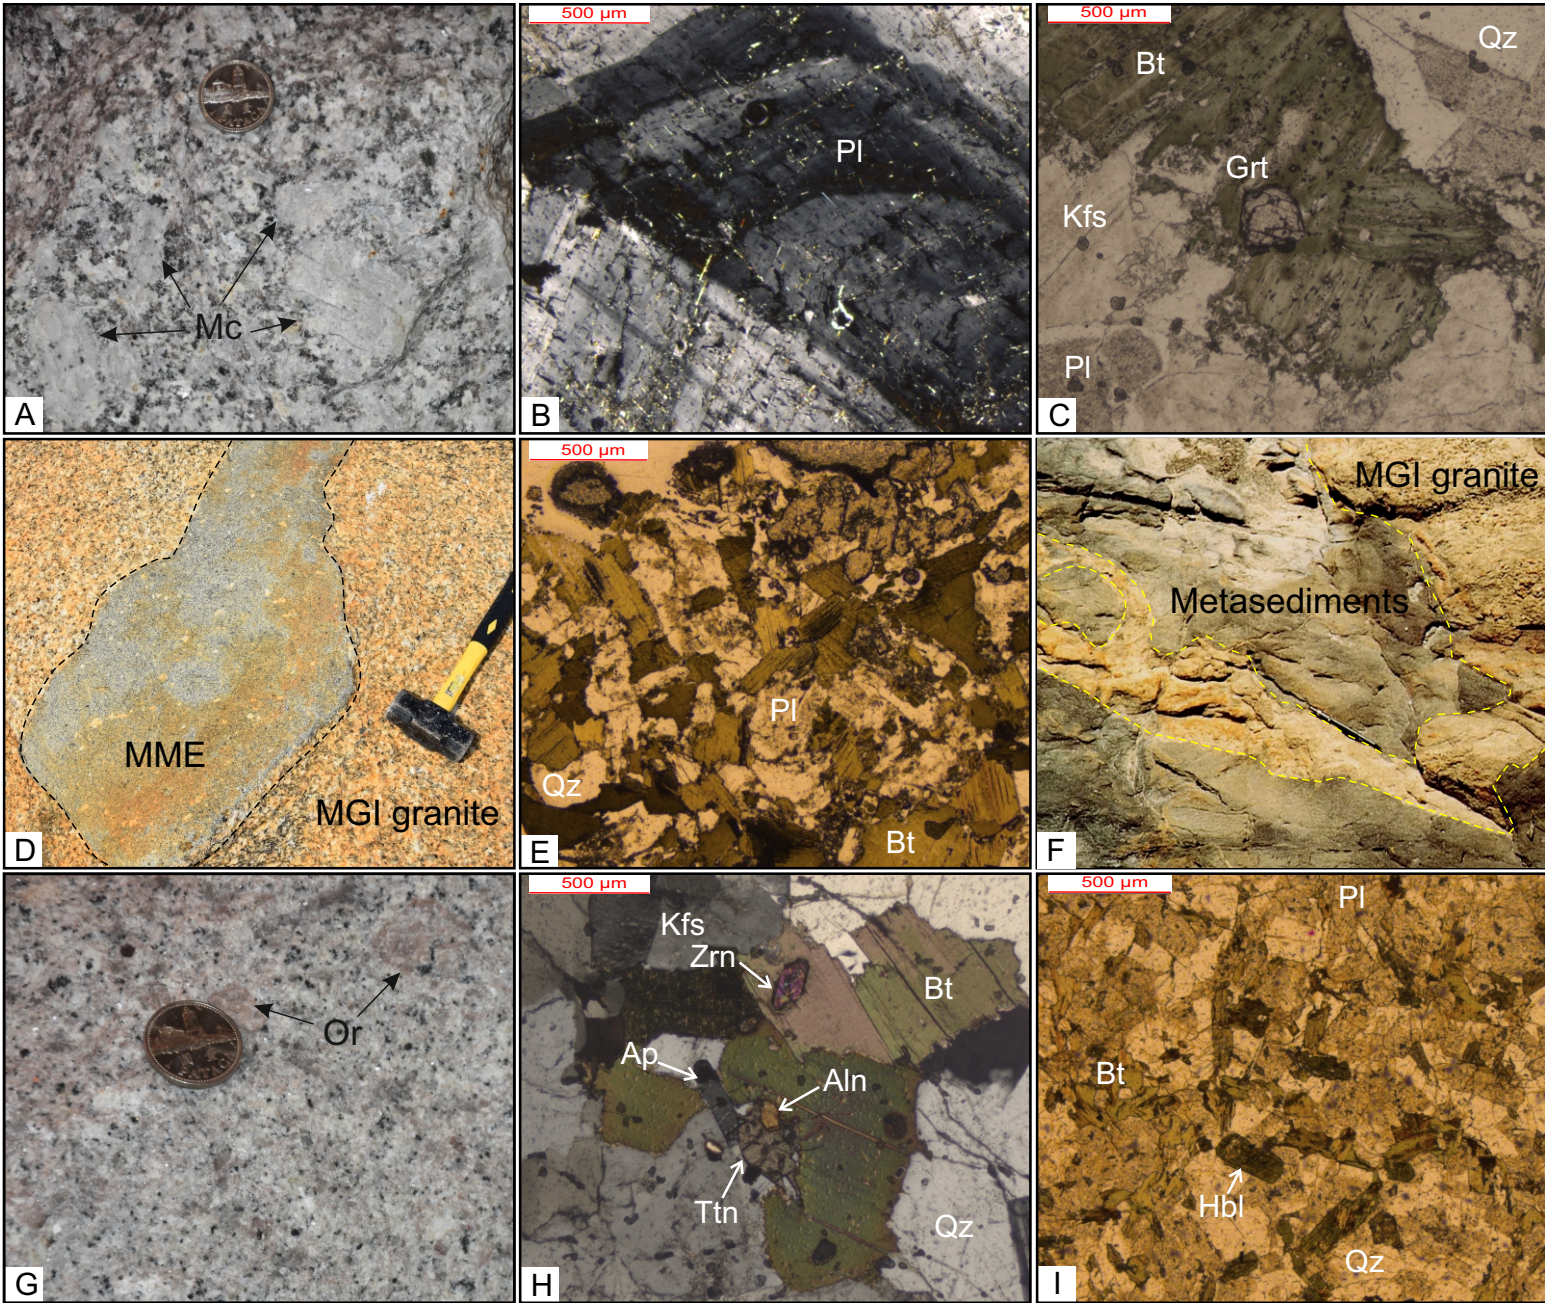

Fig. 3. Hand specimens and thin-sections representative of the different lithofacies observed in Macao: (A) Macao Group I (MGI) coarse-grained porphyritic biotite-microcline (Mc) granite; (B) Plagioclase with oscillatory zoning in MGI coarse-grained porphyritic biotite-microcline granite; (C) Garnet crystal growing at the expense of biotite in a MGI coarse-grained non-porphyritic garnet-bearing biotite-microcline granite; (D) Granodiorite MME enclosed in MGI granite; (E) Microtexture of granodiorite MME enclosed in MGI, mainly composed of biotite, plagioclase and minor quartz; (F) Metasedimentary enclave enclosed and intruded by the MGI non-porphyritic garnet-bearing biotite-microcline granite; (G) Macao Group II (MGII) coarse-grained porphyritic biotite-orthoclase (Or) granite; (H) Biotite aggregation with concentration of accessory minerals in MGII granite; (I) Microtexture of the quartz monzodiorite MME enclosed in MGII granites, characterized by accessory hornblende. MME – mafic microgranular enclave; Qz– quartz; Pl – plagioclase; Kfs – K-feldspar; Ttn – titanite; Bt



# Isochron Diagrams

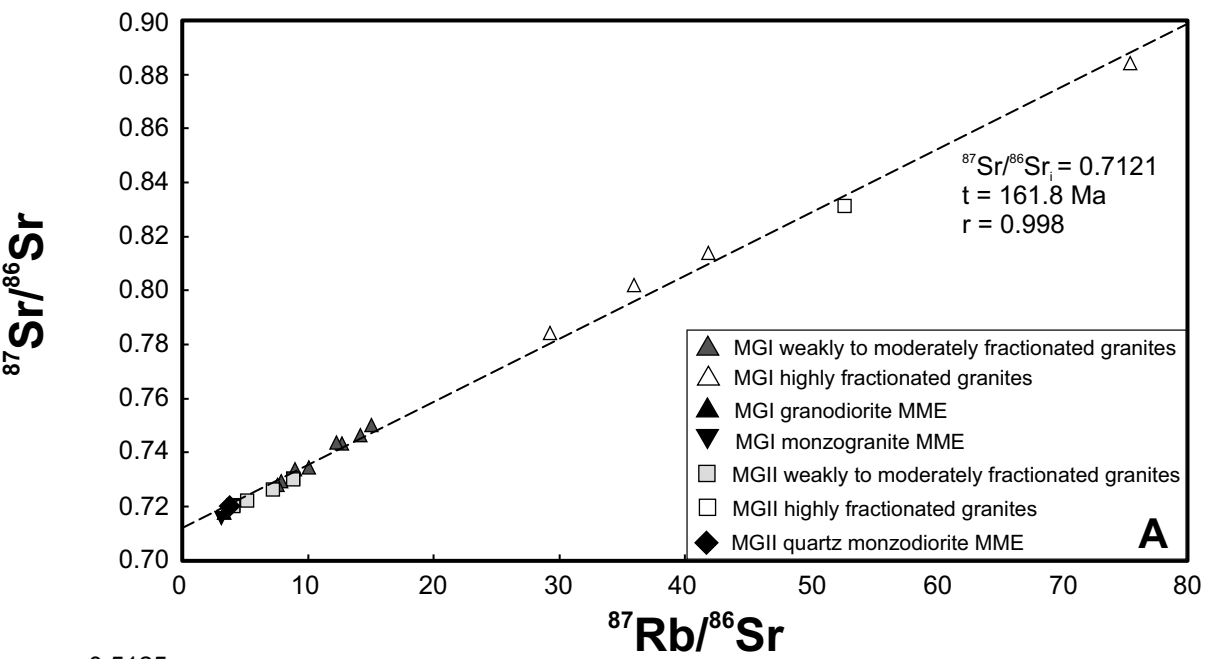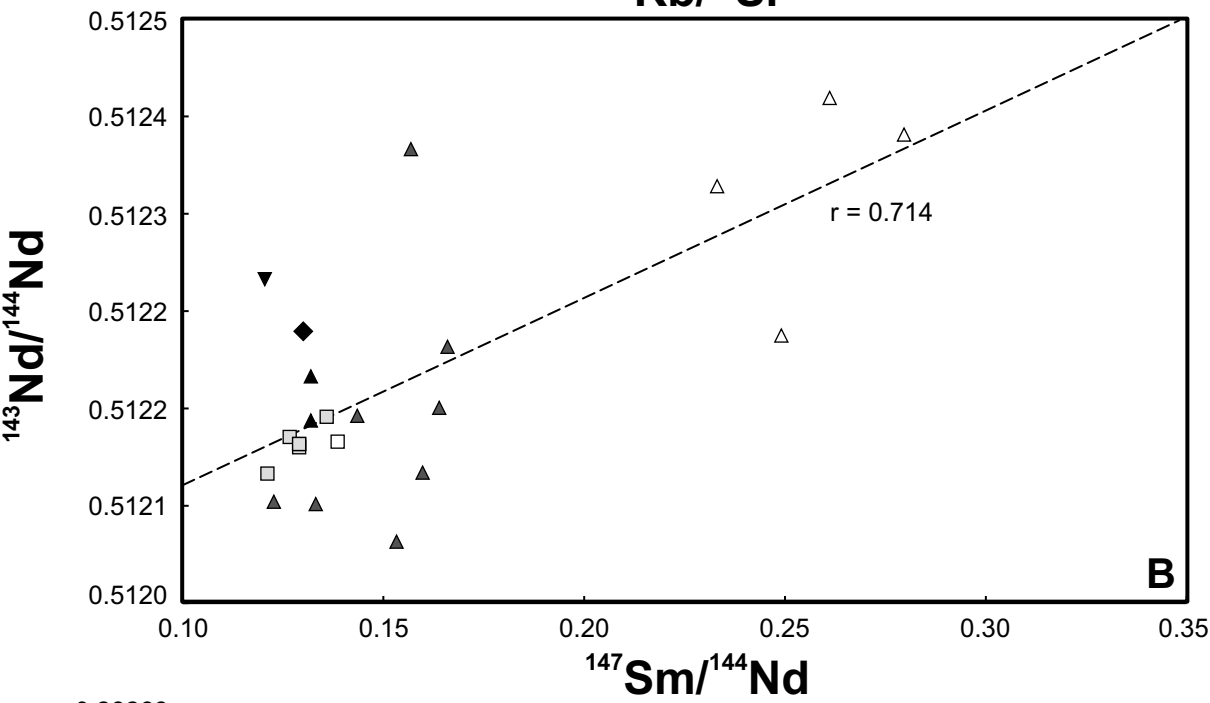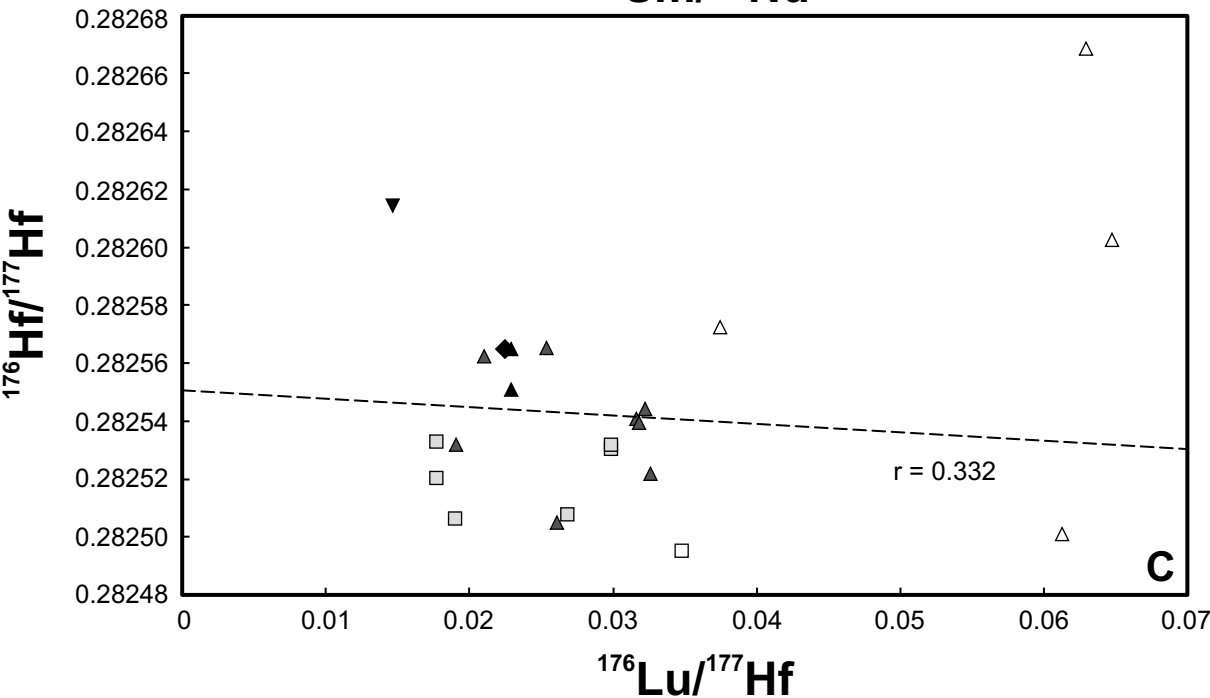

Supplement: Supplementary file 1 [file 1]
